# Supplementary material for: Thiocyanate assisted performance enhancement of formamidinium based planar perovskite solar cells through a single one-step solution process
Source: Royal Society of Chemistry journal article supplement (doi:10.1039/c6ta02999j), 2016-01-01
Supplement: c6ta02999j1.pdf [file c6ta02999j1.pdf]

### Supporting information

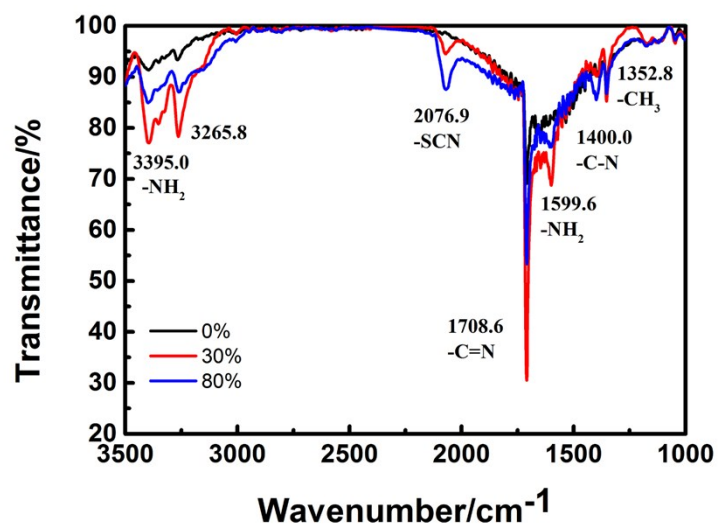

**Fig. S1** Fourier transform infrared spectra of FAPbI<sub>3</sub> perovskite films with and without SCN.
